# Supplementary material for: Associations of family socioeconomic indicators and physical activity of primary school-aged children: a systematic review
Source: PubMed Central journal article supplement (PMC11331658; doi:10.1186/s12889-024-19174-6), 2024-08-19
Supplement: 12889_2024_19174_MOESM1_ESM.pdf [file 12889_2024_19174_MOESM1_ESM.pdf]

## Risk of Bias assessment for the included studies

### Legend

|                                                                                   | Response rate                        | Adjustment                                                  | Sample size                          |
|-----------------------------------------------------------------------------------|--------------------------------------|-------------------------------------------------------------|--------------------------------------|
|  | ≥ 50%                                | adjusted for at least one variable (e.g. age, gender, etc.) | ≥ 500                                |
|  | unclear / not provided / unspecified | unclear / not provided / unspecified                        | unclear / not provided / unspecified |
|  | < 50 %                               | not adjusted                                                | < 500                                |

| Study                              | Response rate                                                                       | Adjustment                                                                            | Sample size                                                                           |
|------------------------------------|-------------------------------------------------------------------------------------|---------------------------------------------------------------------------------------|---------------------------------------------------------------------------------------|
| (Aarts et al., 2012)               |    |    |    |
| (Aarts et al., 2010)               |    |    |    |
| (Aggio et al., 2017)               |    |    |    |
| (Aguilar-Farias et al., 2019)      |    |    |    |
| (Al Yazeedi et al., 2021)          |    |    |    |
| (Alotaibi et al., 2020)            |    |    |    |
| (Atkin et al., 2016)               |    |    |    |
| (Bagordo et al., 2017)             |    |    |    |
| (Barr-Anderson et al., 2017)       |    |    |    |
| (Beckvid Henriksson et al., 2016)  |   |   |   |
| (Brug et al., 2012)                |  |  |  |
| (Butte et al., 2014)               |  |  |  |
| (Cadogan et al., 2014)             |  |  |  |
| (Cárdenas-Fuentes et al., 2021)    |  |  |  |
| (Cvetković et al., 2014)           |  |  |  |
| (da Silva et al., 2014)            |  |  |  |
| (de Moraes Ferrari et al., 2016)   |  |  |  |
| (Deng & Fredriksen, 2018)          |  |  |  |
| (Ding et al., 2020)                |  |  |  |
| (Dmitruk et al., 2015)             |  |  |  |
| (Drenowatz et al., 2010) (Study 1) |  |  |  |
| (Drenowatz et al., 2010) (Study 2) |  |  |  |
| (Duncan et al., 2012)              |  |  |  |
| (Engel-Yeger, 2012)                |  |  |  |
| (Fakhouri et al., 2013)            |  |  |  |
| (Fernández-Alvira et al., 2015)    |  |  |  |
| (Gomes et al., 2017)               |  |  |  |
| (Harbec et al., 2021)              |  |  |  |
| (Herzig et al., 2012)              |  |  |  |
| (Huang et al., 2010)               |  |  |  |
| (Huang et al., 2013)               |  |  |  |
| (Janssen et al., 2014)             |  |  |  |
| (Jerina et al., 2018)              |  |  |  |
| (Jiménez-Pavón et al., 2012)       |  |  |  |
| (Kawalec & Pawlas, 2021)           |  |  |  |
| (Knuth et al., 2017)               |  |  |  |
| (Kobel et al., 2015)               |  |  |  |
| (Lämmle et al., 2012)              |  |  |  |
| (Lampinen et al., 2017)            |  |  |  |

|                                |   |   |   |
|--------------------------------|---|---|---|
| (Larouche et al., 2019)        | ● | ● | ● |
| (Larouche et al., 2019)        | ● | ● | ● |
| (Lepeleere et al., 2015)       | ● | ● | ● |
| (Lewis et al., 2016)           | ● | ● | ● |
| (Love et al., 2019)            | ● | ● | ● |
| (Manyanga et al., 2019)        | ● | ● | ● |
| (Manz et al., 2016) [110]      | ● | ● | ● |
| (Matsudo et al., 2016)         | ● | ● | ● |
| (McCormack et al., 2011)       | ● | ● | ● |
| (McMinn et al., 2013)          | ● | ● | ● |
| (McMinn et al., 2011)          | ● | ● | ● |
| (Moraeus et al., 2012)         | ● | ● | ● |
| (Moraeus et al., 2015) (f)     | ● | ● | ● |
| (Musić Milanović et al., 2021) | ● | ● | ● |
| (Muthuri et al., 2016)         | ● | ● | ● |
| (Muthuri et al., 2014)         | ● | ● | ● |
| (Nakabazzi et al., 2020)       | ● | ● | ● |
| (Noonan & Fairclough, 2018)    | ● | ● | ● |
| (Nyberg et al., 2020)          | ● | ● | ● |
| (Paduano et al., 2021)         | ● | ● | ● |
| (Pate et al., 2022)            | ● | ● | ● |
| (Pouliou et al., 2015)         | ● | ● | ● |
| (Rosell et al., 2021)          | ● | ● | ● |
| (Sanmarchi et al., 2022)       | ● | ● | ● |
| (Schmidt et al., 2022)         | ● | ● | ● |
| (Smith et al., 2015)           | ● | ● | ● |
| (Tandon et al., 2014)          | ● | ● | ● |
| (Tandon et al., 2012)          | ● | ● | ● |
| (Tercedor et al., 2019)        | ● | ● | ● |
| (To et al., 2020)              | ● | ● | ● |
| (van Stralen et al., 2014)     | ● | ● | ● |
| (Vandendriessche et al., 2012) | ● | ● | ● |
| (Vandermeerschen et al., 2015) | ● | ● | ● |
| (Veitch et al., 2010)          | ● | ● | ● |
| (White & McTeer, 2012)         | ● | ● | ● |
| (Wijtzes et al., 2014)         | ● | ● | ● |
| (Wilk et al., 2018)            | ● | ● | ● |
| (Wilkie et al., 2018)          | ● | ● | ● |
